# Supplementary material
Source: ML conference proceedings conference paper supplement (https://openreview.net/forum?id=izNfcaHJk0)
Supplement: supplementary_material [file attachment]

## A Distributed Frequency Estimation

In this section, we consider the frequency estimation problem for federated analytics. Recall that for the frequency estimation task, each client's private data  $x_i \in \{0, 1\}^d$  satisfies  $\|x_i\|_0 = 1$ , and the goal is to estimate  $\pi := \frac{1}{n} \sum_i x_i$  by minimizing the  $\ell_2$  (or  $\ell_1, \ell_\infty$ ) error  $\mathbb{E} [\|\pi - \hat{\pi}(Y^n)\|_2^2]$  subject to communication and  $(\varepsilon, \delta)$ -DP constraints. When the context is clear, we sometimes use  $x_i$  to denote, by abuse of notation, the index of the item, i.e.,  $x_i \in [d]$ .

To fully make use of the  $\ell_0$  structure of the problem, a standard technique is applying a Hadamard transform to convert the  $\ell_0$  geometry to an  $\ell_\infty$  one and then leveraging the recursive structure of Hadamard matrices to efficiently compress local messages.

Specifically, for a given  $b$ -bit constraint, we partition each local item  $x_i$  into  $2^{b-1}$  chunks  $x_i^{(1)}, \dots, x_i^{(2^{b-1})} \in \{0, 1\}^B$ , where  $B := d/2^{b-1}$  and  $x_i^{(j)} = x_i[B \cdot (j-1) : B \cdot j - 1]$ . Note that since  $x_i$  is one-hot, only one chunk of  $x_i^{(j)}$  is non-zero. Then, client  $i$  performs the following Hadamard transform for each chunk:  $y_i^{(\ell)} = H_B \cdot x_i^{(\ell)}$ , where  $H_B$  is defined recursively as follows:

$$H_{2^n} = \frac{1}{\sqrt{2}} \begin{bmatrix} H_{2^{n-1}} & H_{2^{n-1}} \\ H_{2^{n-1}} & -H_{2^{n-1}} \end{bmatrix}, \text{ and } H_0 = [1].$$

Each client then generates a sampling vector  $Z_{ij} \stackrel{\text{i.i.d.}}{\sim} \text{Bern}(\frac{1}{B})$  via shared randomness that is also known by the server, and commits  $(y_i^{(1)}(j), \dots, y_i^{(2^{b-1})}(j))$  as its local report. Since  $(y_i^{(1)}(j), \dots, y_i^{(2^{b-1})}(j))$  only contains a single non-zero entry that can be  $\frac{1}{\sqrt{B}}$  or  $-\frac{1}{\sqrt{B}}$ , the local report can be represented in  $b$  bits ( $b-1$  bits for the location of the non-zero entry and 1 bit for its sign).

From the local reports, the server can compute an unbiased estimator by summing them together (with proper normalization) and performing an inverse Hadamard transform. Moreover, with an adequate injection of Gaussian noise, the frequency estimator satisfies  $(\varepsilon, \delta)$ -DP.

The idea has been used in previous literature under local DP [19, 6, 3, 32], but in order to obtain the order-optimal trade-off under *central*-DP, one has to combine Hadamard transform with a random subsampling step and incorporate the privacy amplification due to random compression in the analysis. In Algorithm 3, we provide a summary of the resultant scheme which builds on the Recursive Hadamard Response (RHR) mechanism from [32], which was originally designed for communication-efficient frequency estimation under *local* DP.

In the following theorem, we control the  $\ell_\infty$  error of Algorithm 3.

**Theorem A.1.** *Let  $\hat{\pi}(x^n)$  be the output of Algorithm 3. Then it holds that for all  $j \in [d]$ ,*

$$\mathbb{E} [\|\pi(j) - \hat{\pi}(j)\|] \leq \sqrt{\frac{\sum_i \mathbb{1}_{\{x_i \in [B \cdot (j-1) : B \cdot j - 1]\}}}{n^2}} + \frac{\sigma^2}{B}, \quad (7)$$

and the  $\ell_2^2$  and  $\ell_1$  errors are bounded by

$$\mathbb{E} [\|\pi - \hat{\pi}\|_2^2] \leq \frac{B}{n} + \frac{d\sigma^2}{B}, \text{ and} \quad (8)$$

$$\mathbb{E} [\|\pi - \hat{\pi}\|_1] \leq \sqrt{\frac{dB}{n} + \frac{d^2\sigma^2}{B}}. \quad (9)$$

**Theorem A.2.** *For any  $\varepsilon, \delta > 0$ , Algorithm 3 is  $(\varepsilon, \delta)$ -DP, if*

$$\sigma^2 \geq O\left(\frac{B^2 \log(B/\delta)}{n^2} + \frac{B(\log(1/\delta) + \varepsilon) \log(B/\delta)}{n^2 \varepsilon^2}\right).$$

By combining Theorem A.1 and Theorem A.2, we conclude that Algorithm 3 achieves  $(\varepsilon, \delta)$ -DP with  $\ell_2^2$  error

$$\begin{aligned} & O\left(\frac{B}{n} + \frac{dB \log(B/\delta)}{n^2} + \frac{d(\log(1/\delta) + \varepsilon) \log(B/\delta)}{n^2 \varepsilon^2}\right) \\ &= O\left(\frac{d}{n^{2b}} + \frac{d^2 \log(d/\delta)}{n^2 2^b} + \frac{d(\log(1/\delta) + \varepsilon) \log(d/\delta)}{n^2 \varepsilon^2}\right). \end{aligned}$$

---

**Algorithm 3** Subsampled Recursive Hadamard Response
 

---

**Input:** user data  $x_1, \dots, x_n \in \{0, 1\}^d$  (where  $d$  is a power of two), DP parameters  $(\varepsilon, \delta)$ , communication budget  $b$ .

**Output:** frequency estimate  $\hat{\pi}$

Set  $B := d/2^{b-1}$  and partition each one-hot vector  $x_i$  into  $2^{b-1}$  chunks:  $x_i^{(1)}, \dots, x_i^{(2^{b-1})} \in \{0, 1\}^B$ .

**for** user  $i \in [n]$  **do**

    Compute the Hadamard transform of each chunk:  $y_i^{(\ell)} = H_B \cdot x_i^{(\ell)}$ .

**for** coordinate  $j \in [B]$  **do**

        Draw  $Z_{i,j} \stackrel{\text{i.i.d.}}{\sim} \text{Bern}(\frac{1}{B})$

**if**  $Z_{i,j} = 1$  **then**

            Send  $(y_i^{(1)}(j), \dots, y_i^{(2^{b-1})}(j))$  to the server.

**end if**

**end for**

**end for**

Server computes the average:  $\forall \ell \in [2^{b-1}], j \in [B]$ ,

$$\hat{y}^{(\ell)}(j) := \frac{B}{n} \sum_{i: Z_{ij}=1} y_i^{(\ell)}(j) + N(0, \sigma^2),$$

where  $\sigma^2$  is computed according to Theorem [A.2](#)

Server performs the inverse Hadamard transform  $\hat{\pi}^{(\ell)} = H_B \cdot \hat{y}^{(\ell)}$ , for  $\ell = 1, \dots, B$ .

**Return:**  $\hat{\pi} = \left( (\hat{\pi}^{(1)})^\top, \dots, (\hat{\pi}^{(2^{b-1})})^\top \right)$ .

---

Notice that when  $n = \tilde{\Omega}(d)$ , the error can be simplified to

$$O\left(\frac{d}{n2^b} + \frac{d(\log(1/\delta) + \varepsilon) \log(d/\delta)}{n^2 \varepsilon^2}\right),$$

612 which matches the order-optimal estimation error (up to a log  $d$  factor) subject to a  $b$ -bit constraint  
 613 [\[54, 3, 2\]](#) and  $(\varepsilon, \delta)$ -DP constraint [\[15, 7\]](#).

## 614 B Proof of Theorem 4.1

615 It is trivial to see that the average communication cost is  $d \cdot \gamma = b$  bits. To compute the  $\ell_2^2$  estimation  
616 error, observe that

$$\begin{aligned}
& \mathbb{E} \left[ \|\hat{\mu}_{x^n} - \mu_{x^n}\|_2^2 \right] \\
&= \sum_{j=1}^d \mathbb{E} \left[ \left( \frac{1}{n\gamma} \sum_i x_i(j) \cdot Z_{i,j} + N(0, \sigma^2) - \frac{1}{n} \sum_i x_i(j) \right)^2 \right] \\
&= \sum_{j=1}^d \frac{1}{n^2} \mathbb{E} \left[ \left( \frac{1}{\gamma} \sum_i x_i(j) \cdot Z_{i,j} - \sum_i x_i(j) \right)^2 \right] + d\sigma^2 \\
&= \sum_{j=1}^d \frac{1}{n^2} \mathbb{E} \left[ \left( \frac{1}{\gamma} \sum_i x_i(j) \cdot Z_{i,j} \right)^2 \right] - \frac{1}{n^2} \left( \sum_i x_i(j) \right)^2 + d\sigma^2 \\
&= \sum_{j=1}^d \frac{1}{n^2} \mathbb{E} \left[ \frac{1}{\gamma^2} \sum_i x_i^2(j) \cdot Z_{i,j}^2 + \frac{1}{\gamma^2} \sum_{i \neq i'} x_i(j)x_{i'}(j)Z_{i,j}Z_{i',j} \right] - \frac{1}{n^2} \left( \sum_i x_i(j) \right)^2 + d\sigma^2 \\
&= \sum_{j=1}^d \frac{1}{n^2} \left( \frac{1}{\gamma} \sum_i x_i^2(j) + \sum_{i \neq i'} x_i(j)x_{i'}(j) \right) - \frac{1}{n^2} \left( \sum_i x_i(j) \right)^2 + d\sigma^2 \\
&= \sum_{j=1}^d \frac{1}{n^2} \left( \frac{1}{\gamma} - 1 \right) \left( \sum_i x_i^2(j) \right) + d\sigma^2 \\
&\leq \frac{dc^2}{n\gamma} + d\sigma^2,
\end{aligned}$$

617 which yields the inequality of (2). Next, we analyze the privacy of Algorithm 1. We first the following  
618 two lemmas for subsampling and the Gaussian mechanism:

619 **Lemma B.1** ([65, 81]). *If  $\mathcal{M}$  is  $(\varepsilon, \delta)$ -DP, then  $\mathcal{M}'$  that applies  $\mathcal{M} \circ \text{PoissonSample}$  satisfies*  
620  *$(\varepsilon', \delta')$ -DP with  $\varepsilon' = \log(1 + \gamma(e^\varepsilon - 1))$  and  $\delta' = \gamma\delta$ .*

621 **Lemma B.2** ([15]). *For any  $\varepsilon, \delta \in (0, 1)$ , the Gaussian output perturbation mechanism with*  
622  *$\sigma^2 := \frac{\Delta^2 2 \log(1.25/\delta)}{\varepsilon^2}$  satisfies  $(\varepsilon, \delta)$ -DP, where  $\Delta$  is the  $\ell_2$  sensitivity of the target function.*

Now, we use the above two lemmas to analyze the per-coordinate privacy leakage of Algorithm 1. For simplicity, we analyze the sum of  $x_i(j)$ 's instead (and normalized it in the last step). Let  $S_j(x^n) := \sum_{i=1}^n x_i(j)$ , then clearly the sensitivity of  $S_j(x^n)$  is  $c$ , so Lemma B.2 implies  $S_j(x^n) + N(0, \sigma_1^2)$  satisfies  $(\varepsilon_1, \delta_1)$ -DP if we set  $\sigma_1^2 = \frac{2c^2 \log(1.25/\delta_1)}{\varepsilon_1^2}$  (assuming  $\varepsilon_1 < 1$ ). Next, if applying subsampling before computing the sum, i.e.,

$$S_j \circ \text{PoissonSample}_\gamma(x^n) := \sum_{i=1}^n x_i(j)Z_{i,j},$$

where  $Z_{i,j} \stackrel{\text{i.i.d.}}{\sim} \text{Bern}(1/\gamma)$  as defined in Algorithm 1, then by Lemma B.1

$$S_j \circ \text{PoissonSample}_\gamma(x^n) + N(0, \sigma_1^2)$$

623 satisfies  $(\varepsilon_2, \delta_2)$ -DP with  $\varepsilon_2 := \log(1 + \gamma(e^{\varepsilon_1} - 1)) = C_1 \gamma \varepsilon_1$  (since we assume  $\varepsilon_1 < 1$ ) and  
624  $\delta_2 := \gamma \delta_1$ . Equivalently, we have

$$\begin{cases} \varepsilon_1 = \tilde{C}_1 \frac{1}{\gamma} \varepsilon_2 \\ \delta_1 = \frac{1}{\gamma} \delta_2. \end{cases} \quad (10)$$

625 Now, since we have established the per-coordinate privacy leakage, we apply the following composi-  
626 tion theorem to account for the total privacy budgets.

**Theorem B.3.** For any  $\varepsilon > 0$ ,  $\delta \in [0, 1]$  and  $\tilde{\delta} \in (0, 1]$ , the class of  $(\varepsilon, \delta)$ -DP mechanisms satisfies  $(\tilde{\varepsilon}_{\tilde{\delta}}, d\delta + \tilde{\delta})$ -DP under  $d$ -fold adaptive composition, for

$$\tilde{\varepsilon}_{\tilde{\delta}} = d\varepsilon(e^\varepsilon - 1) + \varepsilon\sqrt{2d\log(1/\tilde{\delta})}.$$

627 According Theorem B.3, Algorithm 1 satisfies  $(\varepsilon, \delta)$ -DP for

$$\varepsilon = d\varepsilon_2(e^{\varepsilon_2} - 1) + \varepsilon_2\sqrt{2d\log(1/\tilde{\delta})}, \quad (11)$$

628 and  $\delta = d\delta_2 + \tilde{\delta}$  (where  $\tilde{\delta}$  is a free parameter that we can optimize).

Consequently, for a pre-specified (total) privacy budget  $(\varepsilon, \delta)$ , we set parameters as follows. Let  $\tilde{\delta} = \frac{\delta}{2}$  and  $\delta_1 = \frac{1}{\gamma}\delta_2 = \frac{1}{2d\gamma}\delta$ . Let  $\varepsilon_2 \leq 1$  so that  $e^{\varepsilon_2} - 1 \leq 2\varepsilon_2$  holds. Then (11) implies Algorithm 1 is

$$\varepsilon = 2d\varepsilon_2^2 + \varepsilon_2\sqrt{2d\log(1/\tilde{\delta})} \geq d\varepsilon_2(e^{\varepsilon_2} - 1) + \varepsilon_2\sqrt{2d\log(1/\tilde{\delta})}.$$

Solving the above quadratic (in-)equality for  $\varepsilon_2$ , it yields that

$$\varepsilon_2 = \min\left(1, \frac{-\sqrt{2d\log(2/\delta)} + \sqrt{2d\log(2/\delta) + 8\varepsilon d}}{4d}\right) = O\left(\min\left(1, \frac{\varepsilon}{\sqrt{d(\log(1/\delta) + \varepsilon)}}\right)\right).$$

629 Consequently, we set  $\varepsilon_1 = \frac{\tilde{\varepsilon}_1}{\gamma}\varepsilon_2 = O\left(\min\left(1, \frac{\varepsilon}{\gamma\sqrt{d(\log(1/\delta) + \varepsilon)}}\right)\right)$  (note that we require  $\varepsilon_1 = O(1)$ )  
630 so that (10) holds).

Plug in  $(\varepsilon_1, \delta_1)$  into  $\sigma_1^2$ , we have

$$\sigma_1^2 := \frac{2c^2\log(1.25/\delta_1)}{\varepsilon_1^2} = \Omega\left(\max\left(c^2\log(d/\delta), \frac{\gamma^2c^2d(\log(1/\delta) + \varepsilon)\log(d/\delta)}{\varepsilon^2}\right)\right).$$

Finally, as we are interested in estimating the (subsampled) mean instead of the sum, we will normalize the private sum by

$$\hat{\mu}_j(x^n) = \frac{1}{n\gamma} (S_j \circ \text{PoissonSample}_\gamma(x^n) + N(0, \sigma_1^2)) = \frac{1}{n\gamma} S_j \circ \text{PoissonSample}_\gamma(x^n) + N(0, \sigma^2),$$

where

$$\sigma^2 = O\left(\max\left(\frac{c^2\log(d/\delta)}{n^2\gamma^2}, \frac{c^2d(\log(1/\delta) + \varepsilon)\log(d/\delta)}{n^2\varepsilon^2}\right)\right).$$

631 Plugging in  $\sigma^2$  above and  $\gamma = b/d$  yields the desired accuracy in Theorem 4.1 □

632 Since we will reuse the above result, we summarize it into the following lemma:

**Lemma B.4.** Let  $f_i : \mathbb{R}^{d \times m} \mapsto \mathbb{R}^D$  for  $i = 1, \dots, B$  be  $n$  functions with sensitivity bounded by  $\Delta$  (where the number of inputs  $m$  can be a random variable). Then

$$(f_1 \circ \text{PoissonSample}_\gamma(x^n) + N(0, \sigma^2), \dots, f_B \circ \text{PoissonSample}_\gamma(x^n) + N(0, \sigma^2))$$

satisfies  $(\varepsilon, \delta)$ -DP, if

$$\sigma^2 \geq O\left(\max\left(\Delta^2\log(B/\delta), \frac{\gamma^2\Delta^2B(\log(1/\delta) + \varepsilon)\log(B/\delta)}{\varepsilon^2}\right)\right).$$

## 633 C Omitted details of dimension-free communication cost

### 634 C.1 Proof of Theorem 4.4

635 To prove Theorem 4.4, it suffices to prove the following  $\ell_\infty$  version:

636 **Theorem C.1.** Let  $x_1, \dots, x_n \in \{-c, c\}^d$ ,  $d' = \min\left(nb, \frac{n^2 \varepsilon^2}{(\log(1/\delta) + \varepsilon) \log(d/\delta)}\right)$ , and

$$\sigma^2 = O\left(\frac{c^2 \log(1/\delta)}{n^2 \gamma^2} + \frac{c^2 d' (\log(d'/\delta) + \varepsilon) \log(d'/\delta)}{n^2 \varepsilon^2}\right). \quad (12)$$

637 Then Algorithm 2 is  $(\varepsilon, \delta)$ -DP and yields an unbiased estimator on  $\mu$ . In addition, the (average)  
638 per-client communication cost is  $\gamma d' = b$  bits, and the  $\ell_2^2$  estimation error is at most

$$O\left(c^2 d^2 \log\left(\frac{d}{\delta}\right) \max\left(\frac{1}{nb}, \frac{(\log(1/\delta) + \varepsilon)}{n^2 \varepsilon^2}\right)\right). \quad (13)$$

With a slight abuse of notation, we let  $\mu_{\mathcal{J}} \in \mathbb{R}^d$  be such that

$$\mu_{\mathcal{J}}(j) = \begin{cases} 0, & \text{if } j \notin \mathcal{J} \\ \frac{d\mu_j}{d'}, & \text{else.} \end{cases}$$

639 Note that  $\mu_{\mathcal{J}}$  is an unbiased estimate of  $\mu$  if  $\mathcal{J}$  is selected uniformly at random. Then the  $\ell_2^2$  error  
640 can be controlled by

$$\begin{aligned} \mathbb{E} \left[ \|\mu - \hat{\mu}\|_2^2 \right] &\stackrel{(a)}{=} \mathbb{E} \left[ \|\mu - \mu_{\mathcal{J}}\|_2^2 \right] + \mathbb{E} \left[ \|\mu_{\mathcal{J}} - \hat{\mu}\|_2^2 \right] \\ &\stackrel{(b)}{\leq} \mathbb{E} \left[ \|\mu - \mu_{\mathcal{J}}\|_2^2 \right] + \frac{d^2}{d'^2} O\left(\max\left(\frac{d'^2 c^2}{nb}, \frac{d'^3 c^2 \log(d/\delta)}{n^2 b^2}, \frac{c^2 d'^2 (\log(1/\delta) + \varepsilon) \log(d/\delta)}{n^2 \varepsilon^2}\right)\right) \\ &= \mathbb{E} \left[ \|\mu - \mu_{\mathcal{J}}\|_2^2 \right] + O\left(\max\left(\frac{d^2 c^2}{nb}, \frac{d^2 d' c^2 \log(d/\delta)}{n^2 b^2}, \frac{c^2 d^2 (\log(1/\delta) + \varepsilon) \log(d/\delta)}{n^2 \varepsilon^2}\right)\right) \\ &\stackrel{(c)}{\leq} \frac{d^2 c^2}{d'} + O\left(\max\left(\frac{d^2 c^2}{nb}, \frac{d^2 d' c^2 \log(d/\delta)}{n^2 b^2}, \frac{c^2 d^2 (\log(1/\delta) + \varepsilon) \log(d/\delta)}{n^2 \varepsilon^2}\right)\right), \end{aligned}$$

641 where (a) holds since  $\mu_{\mathcal{J}}$  is an unbiased estimate of  $\mu$  and conditioned on  $\mathcal{J}$ ,  $\hat{\mu}$  is an unbiased  
642 estimate of  $\mu_{\mathcal{J}}$ ; (b) follows from Theorem 4.1; (c) holds due to the following fact:

$$\mathbb{E} \left[ \|\mu - \mu_{\mathcal{J}}\|_2^2 \right] \leq \sum_{j \in \mathcal{J}} \mu_{\mathcal{J}}(j)^2 + \sum_{j \in [d]} \mu_j^2 \leq \frac{d^2 c^2}{d'} + dc^2 \leq \frac{2d^2 c^2}{d'}.$$

643 Therefore, by setting  $d' = \min\left(nb, \frac{n^2 \varepsilon^2}{(\log(1/\delta) + \varepsilon) \log(d/\delta)}\right)$  we ensure the first term in (c) is always  
644 smaller than the second term, and the second term can be simplified as follows:

$$\begin{aligned} &O\left(c^2 d^2 \max\left(\frac{1}{nb}, \frac{d' \log(d/\delta)}{n^2 b^2}, \frac{(\log(1/\delta) + \varepsilon) \log(d/\delta)}{n^2 \varepsilon^2}\right)\right) \\ &\leq O\left(c^2 d^2 \max\left(\frac{1}{nb}, \frac{nb \log(d/\delta)}{n^2 b^2}, \frac{(\log(1/\delta) + \varepsilon) \log(d/\delta)}{n^2 \varepsilon^2}\right)\right) \\ &\leq O\left(c^2 d^2 \log(d/\delta) \max\left(\frac{1}{nb}, \frac{(\log(1/\delta) + \varepsilon)}{n^2 \varepsilon^2}\right)\right). \end{aligned}$$

645 Finally, applying the same trick of Kashin's representation, we can transform the  $\ell_\infty$  geometry to  $\ell_2$   
646 (similar to Corollary 4.3), hence proving Theorem 4.4.  $\square$

## 647 D Proof of Theorem A.1

648 Let  $\pi := \frac{1}{n} \sum_i x_i$  and  $\pi^{(\ell)}$  be defined in the same way as  $x_i^{(\ell)}$  for  $\ell \in [B]$ . Then our goal is to bound  
649  $|\pi^{(\ell)}(j) - \hat{\pi}^{(\ell)}(j)|$ , for all  $\ell \in [2^{b-1}]$  and  $j \in [B]$ .

650 To this end, let  $y^{(\ell)} := H_B \cdot \pi^{(\ell)}$  (so it holds that  $\pi^{(\ell)} = \frac{1}{B} H_B \cdot y^{(\ell)}$ ). Then we have

$$\begin{aligned} \mathbb{E} \left[ |\pi^{(\ell)}(j) - \hat{\pi}^{(\ell)}(j)| \right] &\stackrel{(a)}{\leq} \sqrt{\mathbb{E} \left[ (\pi^{(\ell)}(j) - \hat{\pi}^{(\ell)}(j))^2 \right]} \\ &= \sqrt{\mathbb{E} \left[ \left( \frac{1}{B} H_B \cdot (y^{(\ell)} - \hat{y}^{(\ell)})(j) \right)^2 \right]}. \end{aligned} \quad (14)$$

Next, observe that due to the subsampling step, for all  $\ell \in [2^{b-1}]$  and  $j \in [B]$ ,

$$\hat{y}^{(\ell)}(j) = \frac{B}{n} \sum_{i=1}^n \langle (H_B)_j, x_i^{(\ell)} \rangle \cdot Z_{ij} + N(0, \sigma^2),$$

651 where recall that  $Z_{ij} \stackrel{\text{i.i.d.}}{\sim} \text{Ber}(1/B)$ . Therefore,  $\hat{y}^{(\ell)}(j)$  is an unbiased estimator of  $y^{(\ell)}(j)$ . In  
 652 addition, since we choose  $Z_{ij}$  independently in Algorithm 3,  $\hat{y}^{(\ell)}(j)$ 's are independent for different  
 653  $j$ 's, so we have

$$\begin{aligned} \mathbb{E} \left[ \left( \hat{y}^{(\ell)}(j) - y^{(\ell)}(j) \right)^2 \right] &= \text{Var} \left( \hat{y}^{(\ell)}(j) \right) \\ &= \sigma^2 + \frac{B^2}{n^2} \sum_{i=1}^n \langle (H_B)_j, x_i^{(\ell)} \rangle^2 \text{Var}(Z_{ij}) \\ &\leq \sigma^2 + \frac{B}{n^2} \sum_{i=1}^n \langle (H_B)_j, x_i^{(\ell)} \rangle^2 \\ &= \sigma^2 + \underbrace{\frac{B}{n^2} \sum_{i=1}^n \mathbb{1}_{\{x_i \in \ell\text{-th chunk}\}}}_{:= C_\ell}, \end{aligned} \quad (15)$$

654 and for all  $j \neq j'$

$$\mathbb{E} \left[ \left( \hat{y}^{(\ell)}(j) - y^{(\ell)}(j) \right) \cdot \left( \hat{y}^{(\ell)}(j') - y^{(\ell)}(j') \right) \right] = 0. \quad (16)$$

655 Therefore, we continue bounding (14) as follows:

$$\begin{aligned} \sqrt{\mathbb{E} \left[ \left( \frac{1}{B} H_B \cdot (y^{(\ell)} - \hat{y}^{(\ell)})(j) \right)^2 \right]} &= \sqrt{\frac{1}{B^2} \mathbb{E} [\langle (H_B)_j, (y^{(\ell)} - \hat{y}^{(\ell)}) \rangle^2]} \\ &= \sqrt{\frac{1}{B^2} \mathbb{E} \left[ \left( \sum_{k=1}^B (H_B)_{jk} \cdot (\hat{y}^{(\ell)}(k) - y^{(\ell)}(k)) \right)^2 \right]} \\ &\stackrel{(a)}{=} \sqrt{\frac{1}{B^2} \mathbb{E} \left[ \sum_{k=1}^B (\hat{y}^{(\ell)}(k) - y^{(\ell)}(k))^2 \right]} \\ &\stackrel{(b)}{=} \sqrt{\frac{C_\ell}{n^2} + \frac{\sigma^2}{B}} \\ &\stackrel{(c)}{\leq} \sqrt{\frac{1}{n} + \frac{\sigma^2}{B}}, \end{aligned}$$

656 where (a) holds since each entry of  $H_B$  takes value in  $\{-1, 1\}$  and by (16), (b) holds due to (15), and  
 657 (c) holds because  $C_\ell \leq n$  for all  $\ell$ .

Finally, to bound the  $\ell_2^2$  error, observe that the above analysis ensures that

$$\mathbb{E} \left[ \left( \pi^{(\ell)}(j) - \hat{\pi}^{(\ell)}(j) \right)^2 \right] \leq \frac{C_{\ell(j)}}{n^2} + \frac{\sigma^2}{B},$$

where  $\ell(j) \in [2^{b-1}]$  is the index of the chunk containing  $j$ . Therefore, summing over  $j \in [d]$ , we must have

$$\mathbb{E} \left[ \left\| \pi^{(\ell)} - \hat{\pi}^{(\ell)} \right\|_2^2 \right] \leq \sum_{j=1}^d \frac{C_{\ell(j)}}{n^2} + \frac{d\sigma^2}{B} = \frac{B}{n} + \frac{d\sigma^2}{B},$$

since

$$\sum_j C_{\ell(j)} = \sum_{\ell=1}^{2^{b-1}} \sum_{j' \in \ell\text{-th chunk}} \sum_{i=1}^n \mathbb{1}_{\{i \in \ell\text{-th chunk}\}} = B \sum_{\ell=1}^{2^{b-1}} \sum_{i=1}^n \mathbb{1}_{\{i \in \ell\text{-th chunk}\}} = B \cdot n.$$

658

□

## E Proof of Theorem A.2

Let  $f_j(x^n) := (\pi^{(1)}(j), \dots, \pi^{(2^{b-1})}(j))$ , for  $j = 1, \dots, B$ . Then the  $\ell_2$  sensitivity of  $f_j$  is  $\Delta = \frac{B}{n}$ . Set the sampling rate  $\gamma = \frac{1}{B}$  and the proof is complete by Lemma B.4.  $\square$

## F Algorithm of Shuffled SQKR

---

### Algorithm 4 Shuffled SQKR

---

**Input:** users' data  $x_1, \dots, x_n$ , local-DP parameter  $\varepsilon_0$ , communication parameters  $b_0, T$

**Output:** mean estimator  $\hat{\mu}$

**for** round  $k \in [T]$  **do**

**for** user  $i \in [n]$  **do**

    Sample  $s(i, 1), \dots, s(i, b_0) \stackrel{\text{i.i.d.}}{\sim} \text{Unif}[d]$

    Sample  $Z \sim \text{Bern}\left(\frac{e^{\varepsilon_0}}{e^{\varepsilon_0} + 2^{b_0} - 1}\right)$

**if**  $Z=1$  **then**

      Set  $Y(i, 1), \dots, Y(i, b_0) \leftarrow x_i(s(i, 1)), \dots, x_i(s(i, b_0))$

**else**

      Sample  $Y(i, 1), \dots, Y(i, b_0) \stackrel{\text{i.i.d.}}{\sim} \text{Unif}\{-c, c\}$

**end if**

    Send  $Y(i, 1), \dots, Y(i, b_0)$  and  $s(i, 1), \dots, s(i, b_0)$  to shuffler

**end for**

  Shuffler samples a permutation  $\pi \sim \text{Unif}\{f : [n] \rightarrow [n] \text{ bijective}\}$

**for**  $j \in [b_0]$  **do**

    Shuffler sends  $Y(\pi(1), j), \dots, Y(\pi(n), j)$  and  $s(\pi(1), j), \dots, s(\pi(n), j)$  to server

**end for**

$\hat{\mu}^{(k)} \leftarrow \frac{d}{nb_0} \frac{e^{\varepsilon_0} + 2^{b_0} - 1}{e^{\varepsilon_0} - 1} \sum_{i=1}^n \sum_{j=1}^{b_0} Y(\pi(i), j) e_{s(\pi(i), j)}$

**end for**

Return  $\hat{\mu} := \frac{1}{T} \sum_{k=1}^T \hat{\mu}^{(k)}$

---

## G Proof of Theorem 5.3

Each round  $x^n \mapsto \hat{\mu}^{(k)}$  of Algorithm 4 implements the private-coin SQKR scheme of [32], achieving the communication cost and error as stated in Lemma 5.2

**Lemma G.1** (SQKR [32]). *For all  $\varepsilon_0 > 0, b_0 > 0$ , the random mapping  $x_i \mapsto Y(i, 1), \dots, Y(i, b_0), s(i, 1), \dots, s(i, b_0)$  in Algorithm 4 is  $(\varepsilon_0, 0)$ -LDP and has output that can be communicated in  $b_0 \log(d)$  bits, and the  $\hat{\mu}^{(k)}$  computed from  $Y(i, 1), \dots, Y(i, b_0), s(i, 1), \dots, s(i, b_0)$  is an unbiased estimator of  $\mu$  satisfying*

$$\max_{x^n} \mathbb{E} \left[ \left\| \mu(x^n) - \hat{\mu}^{(k)}(x^n) \right\|_2^2 \right] = O \left( \frac{c^2 d}{n \min(\varepsilon_0^2, \varepsilon_0, b_0)} \right). \quad (17)$$

We now characterize the error performance of Algorithm 4 for general choices of parameters that satisfy privacy and communication constraints.

**Proposition G.2.** *For all  $\varepsilon > 0, b > 0, n > 0$ , with any arbitrary choice of*

$$\delta_1 \in \left( e^{-n/16e}, 1 \right] \quad (18)$$

$$\delta_2 \in (0, 1], \quad (19)$$

*there exists a choice of parameters  $\varepsilon_0, b_0, T$  such that Algorithm 4 is  $(\varepsilon, T\delta_1 + \delta_2)$ -DP, uses no more than  $b$  bits of communication, and produces  $\hat{\mu}$  such that*

$$\max_{x^n} \mathbb{E} \left[ \left\| \mu - \hat{\mu} \right\|_2^2 \right] = O \left( \max \left( \frac{c^2 d \log(d) b_0}{nb}, \frac{c^2 d \log(1/\delta_1) (\log(1/\delta_2) + \varepsilon)}{n^2 \varepsilon^2} \right) \right). \quad (20)$$

675 *Proof.* For arbitrary choice of

$$b_0 < \log \left( \frac{n}{16 \log(2)} \right), \quad (21)$$

676 it suffices to choose

$$T = \left\lfloor \frac{b}{(\log_2(d) + 1)b_0} \right\rfloor \quad (22)$$

$$\varepsilon_0 = O \left( \min \left( 1, \frac{\varepsilon \sqrt{n}}{\sqrt{T \log(1/\delta_1) (\log(1/\delta_2) + \varepsilon)}} \right) \right). \quad (23)$$

677 The fact that Algorithm 4 uses less than  $b$  bits is immediate from the choice of  $T$ .

678 Applying Lemma G.1 by construction the mapping from each  $x_i$  to  $Y(i, 1), \dots, Y(i, b_0)$  is  $(\varepsilon_0, 0)$ -LDP. By assumption

$$\delta_1 > e^{-n/16e}, \quad (24)$$

680 the inequality

$$1 < \log \left( \frac{n}{16 \log(2/\delta_1)} \right) \quad (25)$$

681 is satisfied. Then the choice of

$$\varepsilon_0 \leq 1 \quad (26)$$

682 also satisfies  $\varepsilon_0 \leq \log \left( \frac{n}{16 \log(2/\delta)} \right)$ , so by Lemma 5.1 the mapping  $x^n \mapsto \hat{\mu}^{(k)}$  is  $(\varepsilon_1, \delta_1)$ -DP. where

$$\varepsilon_1 = O \left( \frac{\varepsilon_0 \sqrt{\log(1/\delta_1)}}{\sqrt{n}} \right). \quad (27)$$

683 Since the output of Algorithm 4 is a function of  $(\hat{\mu}^{(1)}, \dots, \hat{\mu}^{(T)})$ , by B.3 it suffices to have

$$\varepsilon_1 = O \left( \min \left( 1, \frac{\varepsilon}{\sqrt{T(\log(1/\delta_2) + \varepsilon)}} \right) \right) \quad (28)$$

684 for Algorithm 4 to be  $(\varepsilon, T\delta_1 + \delta_2)$ -DP. The first inequality follows from the assumption of  $\delta_1 > e^{-n/16e}$  and choice of  $\varepsilon_0 = O(1)$ , and the second from choice of

$$\varepsilon_0 = O \left( \frac{\varepsilon \sqrt{n}}{\sqrt{T \log(1/\delta_1) (\log(1/\delta_2) + \varepsilon)}} \right). \quad (29)$$

686 Since  $\varepsilon_0 \leq 1 \leq b$ , we have  $\min(\varepsilon_0^2, \varepsilon_0, b) = \varepsilon_0^2$ . Applying Lemma G.1

$$\max_{x^n} \mathbb{E} [\|\mu - \hat{\mu}\|_2^2] = \frac{1}{T} \max_{x^n} \mathbb{E} [\|\mu - \hat{\mu}^{(1)}\|_2^2] \quad (30)$$

$$= O \left( \frac{d}{T n \varepsilon_0^2} \right) \quad (31)$$

$$= O \left( \max \left( \frac{d}{T n}, \frac{d \log(1/\delta_1) (\log(1/\delta_2) + \varepsilon)}{n^2 \varepsilon^2} \right) \right). \quad (32)$$

687 Substituting the choice of  $T$  gives the desired result.  $\square$

688 To show Theorem 5.3, it suffices to choose

$$b_0 = 1 \quad (33)$$

$$\delta_1 = \frac{\delta}{2T} \quad (34)$$

$$\delta_2 = \frac{\delta}{2}, \quad (35)$$

689 which requires  $n > 16e \log(2) \approx 30.14$  due to (21), and apply the previous proposition.



## H Rényi-DP for Shuffled SQKR

In this section we restate some results for RDP which are useful for privacy accounting in experiments. Following the proof of Corollary 4.3 in [44], applying Theorem 4.1 in the same paper yields the following.

**Lemma H.1.** *Let  $\mathcal{M}_i$  be an independent  $(\varepsilon_0, 0)$ -LDP mechanism for each  $i \in [n]$  with  $\varepsilon_0 \leq 1$  and  $\pi$  be a random permutation of  $[n]$ . Then for any  $\alpha < \frac{n}{16\varepsilon_0 \exp(\varepsilon_0)}$ , the mechanism*

$$\mathcal{S} : (x_1, \dots, x_n) \mapsto (\mathcal{M}_1(x_{\pi(1)}), \dots, \mathcal{M}_n(x_{\pi(n)}))$$

is  $(\varepsilon_1(\alpha), \delta)$ -RDP with

$$\varepsilon_1(\alpha) = \frac{\log(e^{2\alpha^2\sigma^2} + 4\delta_{\min}e^{\alpha\varepsilon_0})}{\alpha - 1}, \quad (36)$$

where

$$\sigma = 8\sqrt{\frac{e^{\varepsilon_0}}{n}} \quad (37)$$

$$\delta_{\min} = e^{-\frac{n}{8(\varepsilon_0+1)}}. \quad (38)$$

For small  $\varepsilon_0$ , the result below is useful.

**Lemma H.2** ([40]). *Under the same assumptions as Lemma H.1  $\mathcal{S}$  is  $(\varepsilon(\alpha), \delta)$ -RDP*

$$\varepsilon_1(\alpha) = 2\alpha e^{4\varepsilon_0} (e^{\varepsilon_0} - 1)^2 / n. \quad (39)$$

Applying Lemma G.1 by construction the mapping from each  $x_i$  to  $y(i, 1), \dots, y(i, b_0)$  is  $(\varepsilon_0, 0)$ -LDP. By Lemma H.1 respectively Lemma H.2 the mapping  $x^n \mapsto \hat{\mu}^{(k)}$  is  $(\varepsilon_1(\alpha), \alpha)$ -RDP where  $\varepsilon_1(\alpha)$  is given by (36), respectively (39). By composition, Algorithm 4 is  $(T\varepsilon(\alpha), \alpha)$ -RDP.

We can convert this bound back to  $(\varepsilon, \delta)$ -DP using Proposition 12 from [30].

**Proposition H.3.** *For all  $\delta > 0$ , Algorithm 4 is  $(\varepsilon, \delta)$ -DP where*

$$\varepsilon = \inf_{\alpha \in (1, \infty)} T\varepsilon_1(\alpha) + \frac{\log(1/\delta) + (\alpha - 1)\log(1 - 1/\alpha) - \log(\alpha)}{\alpha - 1}, \quad (40)$$

where

$$\varepsilon_1(\alpha) = \min \left( 2\alpha e^{4\varepsilon_0} (e^{\varepsilon_0} - 1)^2 / n, \frac{\log(e^{2\alpha^2\sigma^2} + 4\delta_{\min}e^{\alpha\varepsilon_0})}{\alpha - 1} \right) \quad (41)$$

and  $\sigma, \delta_{\min}$  are given by (37), (38) respectively.

## I Additional Experiments

Here experiments are done with the same setup as in Section 6, with local vectors  $X_i(j) \stackrel{\text{i.i.d.}}{\sim} \frac{1}{\sqrt{d}} (2 \cdot \text{Ber}(0.8) - 1)$ . We set  $\delta = 10^{-6}$ .

Figure 2 illustrates separation between Algorithm 4 and LDP schemes. Algorithm 4 achieves error decreasing quadratically with  $n$  as guaranteed by Theorem 5.3. With only one round of shuffling, there is separation from the LDP scheme only when  $n$  is sufficiently large, and thus order-optimal error performance only occurs for large  $n$  (or equivalently small  $\varepsilon$ ). This problem is avoided with multiple rounds of shuffling.

Figure 3 compares the performance of CSGM with and without coordinate pre-selection. In this regime coordinate pre-selection improves performance for all  $b$ . As predicted by Corollary 4.3 and Corollary 4.5, the MSE decreases with  $b$  but is effectively constant for sufficiently high  $b$  where the privacy term dominates. We can determine the communication cost needed for order-optimal central DP error performance to be the  $b$  at which the MSE is within some fixed constant factor away from the limiting value. We see that the communication cost increases with dimension  $d$  with the vanilla CSGM scheme, but a dimension-free communication cost is achieved with coordinate pre-selection.

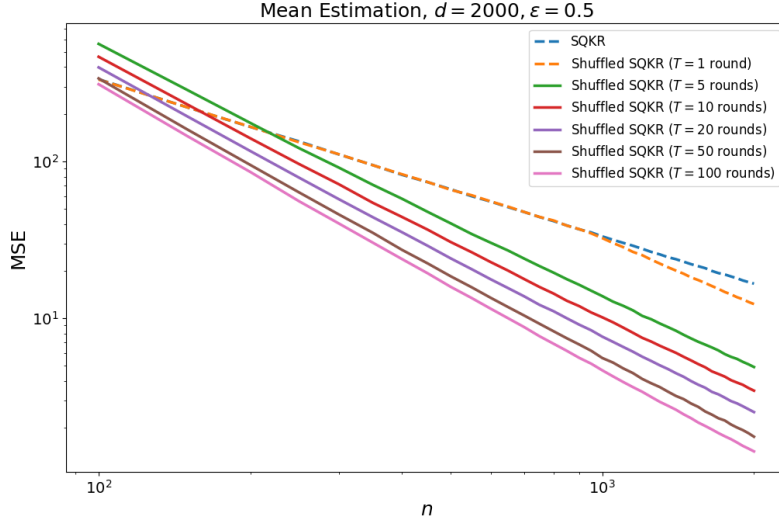

Figure 2: Comparison of MSE vs. number of clients  $n$  for LDP scheme (SQKR) and shuffled SQKR. For shuffled SQKR, we set  $b_0 = 1$  and choose  $\varepsilon_0$  using results in Section [H](#). Communication cost is  $\lceil (\log_2(2000) + 1) \rceil = 12$  bits per round.

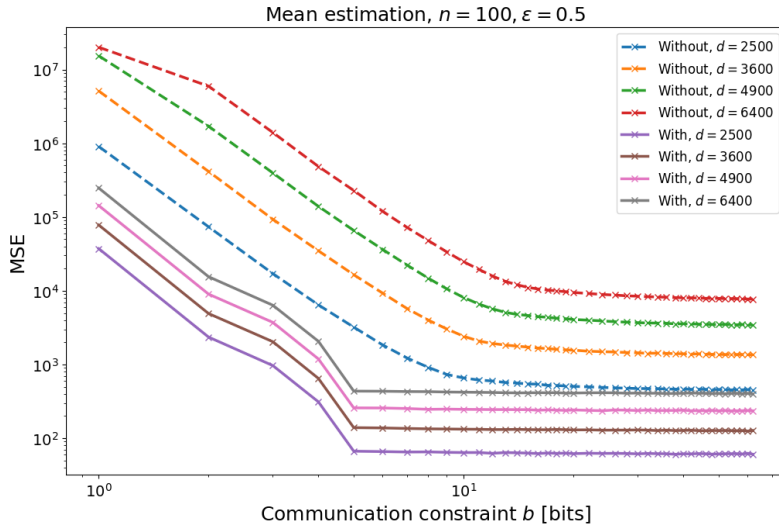

Figure 3: CSGM with and without coordinate pre-selection using  $d' = 833$ .
